# Supplementary material for: Single-Cell Network-Based Drug Repositioning for Discovery of Therapies against Anti-Tumour Necrosis Factor-Resistant Crohn’s Disease
Source: MDPI journal article supplement (doi:10.3390/ijms241814099), 2023-09-14

**Supplementary figure S1.** Differences of cellular heterogeneity between the inflamed colonic tissue (Involved) normal colonic tissue (Uninvolved) during anti-TNF therapy in CD.

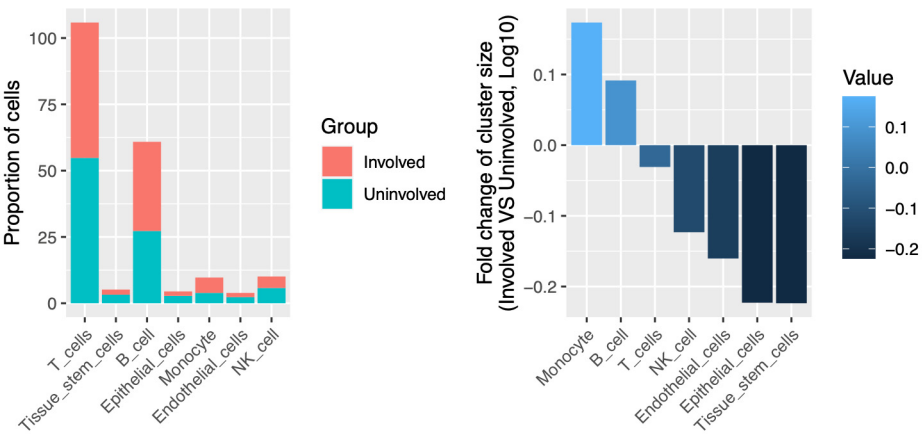

**Supplementary figure S2.** The drug scores for the anti-TNF resistance in all samples among top-ranked significant drugs, according to both edgeR and limma algorithms (FDR < 0.05).

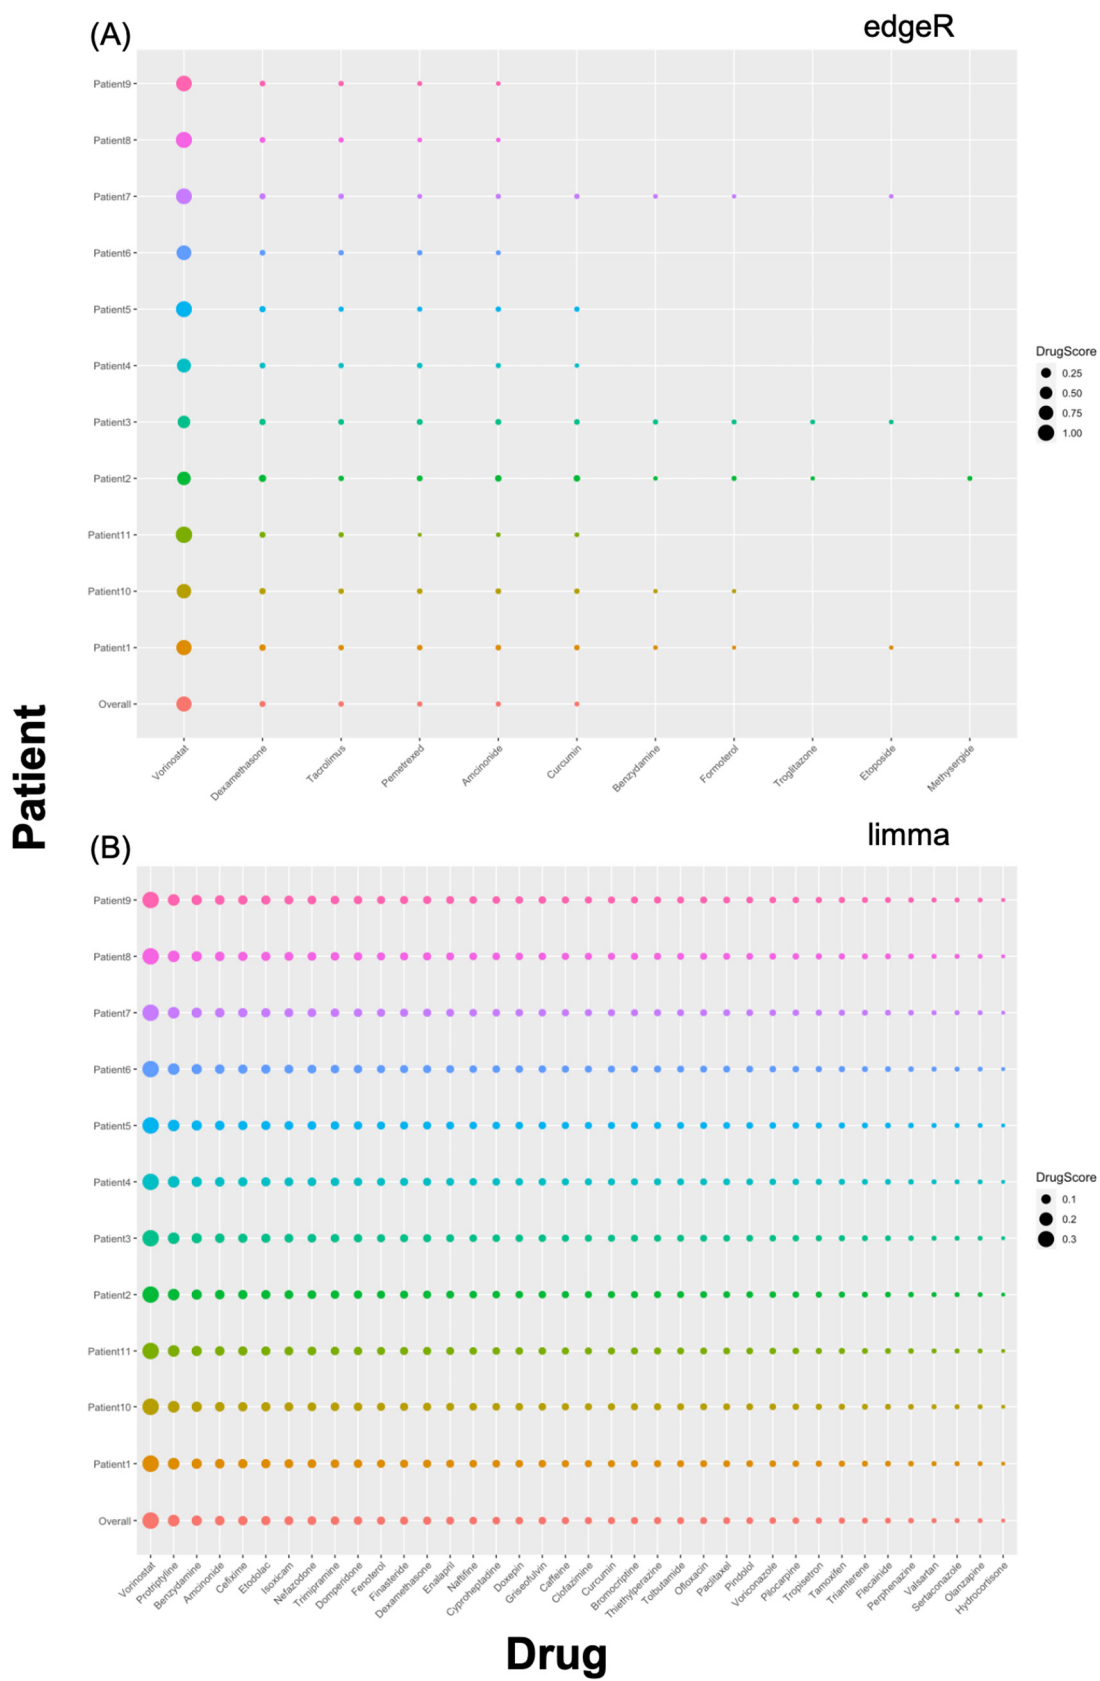

Supplement: s1 [file s1]
